1 **De Novo Phosphoinositide Synthesis in Zebrafish Is Required for**  
2 **Triad Formation but Not Essential for Myogenesis**

3

4 Lindsay Smith<sup>1,2</sup>, Lacramioara Fabian<sup>1</sup>, Almundher Al-Maawali<sup>1,3</sup>, Ramil R. Noche<sup>4</sup>,  
5 James J. Dowling<sup>1,5,6\*</sup>

6

7 <sup>1</sup> Genetics and Genome Biology Program, The Hospital for Sick Children, Toronto,  
8 Ontario, Canada

9 <sup>2</sup> Ontario Institute for Cancer Research, Toronto, Ontario, Canada

10 <sup>3</sup> Department of Genetics, College of Medicine and Health Sciences, Sultan Qaboos  
11 University & Sultan Qaboos University Hospital , Muscat, Oman

12 <sup>4</sup> Zebrafish Genetics and Disease Models Core Facility, The Hospital for Sick Children,  
13 Toronto, Ontario, Canada

14 <sup>5</sup> Division of Neurology, The Hospital for Sick Children, Toronto, Ontario, Canada

15 <sup>6</sup> Departments of Paediatrics and Molecular Genetics, University of Toronto, Toronto,  
16 Ontario, Canada

17

18

19

20 \*Corresponding author:

21 Email: [james.dowling@sickkids.ca](mailto:james.dowling@sickkids.ca) (JJD)

22

23

## 24 **Abstract**

25 Phosphoinositides (PIPs) and their regulatory enzymes are key players in many cellular  
26 processes and are required for aspects of vertebrate development. Dysregulated PIP  
27 metabolism has been implicated in several human diseases, including a subset of  
28 skeletal myopathies that feature structural defects in the triad. The role of PIPs in  
29 skeletal muscle formation, and particularly triad biogenesis, has yet to be determined.  
30 CDP-diacylglycerol-inositol 3-phosphatidyltransferase (CDIPT) catalyzes the formation  
31 of phosphatidylinositol, which is the base of all PIP species. Loss of CDIPT should, in  
32 theory, result in the failure to produce PIPs, and thus provide a strategy for establishing  
33 the requirement for PIPs during embryogenesis. In this study, we generated *cdipt*  
34 mutant zebrafish and determined the impact on skeletal myogenesis. Analysis of *cdipt*  
35 mutant muscle revealed no apparent global effect on early muscle development.  
36 However, small but significant defects were observed in triad size, with T-tubule area,  
37 inter terminal cisternae distance and gap width being smaller in *cdipt* mutants. This was  
38 associated with a decrease in motor performance. Overall, these data suggest that  
39 myogenesis in zebrafish does not require *de novo* PIP synthesis but does implicate a  
40 role for CDIPT in triad formation.

## 41 **Introduction**

42 The primary function of skeletal muscle is to produce the force that initiates and controls  
43 movement. Muscle has a number of unique substructures that are dedicated to force  
44 production, including the sarcomere, the neuromuscular junction (NMJ) and the triad  
45 (Dowling et al., 2014). As our understanding of the molecular basis of human muscle  
46 diseases grows, it is becoming more apparent that many myopathies involve alterations  
47 to at least one of these structures (Dowling et al., 2014; Gonorazky et al., 2018; Nance  
48 et al., 2012). Of increasing significance are the abnormalities in the structure and  
49 function of the triad, which represents the apposition of the T-tubules and the terminal  
50 cisternae of the sarcoplasmic reticulum (SR). The key role of the triad is to mediate  
51 excitation-contraction coupling (EC coupling), the process by which skeletal muscle  
52 translates neuronal signals into muscle contraction (Al-Qusairi and Laporte, 2011;  
53 Jungbluth et al., 2018).

54 Although triad malformations are considered the major cause of muscle weakness in  
55 many myopathies (Dowling et al., 2014), the factors that govern the development and  
56 maintenance of the triad remain unclear. Recent data has suggested that  
57 phosphoinositides may play an important role in triad formation and/or maintenance.  
58 Phosphoinositides (PIPs) are a family of membrane phospholipids involved in many  
59 essential cell functions, including cellular signaling, endocytosis, and autophagy, and  
60 are present in almost all cell types across eukaryotic species (De Camilli et al., 1996)  
61 (Balla, 2013). Formation and turnover of the various PIP species are catalyzed by  
62 evolutionarily conserved families of kinases and phosphatases (De Matteis and Godi,  
63 2004; Viaud et al., 2016). Dysregulation of PIPs and their metabolic enzymes have

64 been implicated in a number of human diseases, such as congenital myopathies,  
65 Charcot-Marie-Tooth Disease (CMT), Alzheimer's disease, and some forms of cancer  
66 (Bunney and Katan, 2010; Lo Vasco, 2018; Nicholson et al., 2011; Volpatti et al., 2019).

67 The consideration of a potential role for PIPs in muscle development comes from two  
68 areas of study. One is the work surrounding BIN1, a BAR domain-containing protein  
69 that is known to recognize and induce membrane curvature (Peter et al., 2004); (Frost  
70 et al., 2009). BIN1 has a PIP-binding domain that interacts with PIP2 (one of the seven  
71 PIP sub-species), and this interaction plays a critical role in the formation of T-tubules.

72 Recessive mutations in *BIN1* result in centronuclear myopathy, a severe congenital  
73 muscle disease featuring abnormal muscle structure including disturbance of the T-  
74 tubule and the triad as a whole. The second line of evidence comes from another form  
75 of centronuclear myopathy called X-linked myotubular myopathy or XLMTM (Dowling et  
76 al., 2009) (Amoasii et al., 2012). XLMTM is caused by mutations in the PIP  
77 phosphatase myotubularin. Mutation in myotubularin causes accumulation of PI3P and  
78 leads to abnormalities in the appearance and number of the triad.

79 In this study, we investigated the role of PIPs in skeletal muscle triad development using  
80 the zebrafish model system. Zebrafish is an elegant model for studying skeletal muscle  
81 development (Gibbs et al., 2013). Skeletal muscle develops rapidly in zebrafish, muscle  
82 fibers are already developing by 24 hours post-fertilization (hpf), with elongated fibers  
83 visible by 2 days post-fertilization (dpf). Skeletal muscle is highly prominent in embryos  
84 and larvae, and the transparency of developing fish allows muscle fibers to be easily  
85 observed. Additionally, zebrafish muscle shares many structural and histological  
86 features with mammalian muscle.

87 To determine the overall requirement for PIPs in muscle development we used the  
88 CRISPR/Cas9 technology to generate a *cdipt* zebrafish mutant. CDIPT, also known as  
89 phosphatidylinositol synthase (PIS), catalyzes the addition of a *myo*-inositol ring to a  
90 phospholipid backbone, cytidine diphosphate-diacylglycerol (CDP-DAG), to generate  
91 the base of all PIPs, phosphatidylinositol (PI) (Lykidis et al., 1997) (Fig 1A). This is the  
92 only protein currently known to perform this function in zebrafish (Thakur et al., 2011).  
93 CDIPT is a highly conserved integral membrane protein found on the cytoplasmic side  
94 of the endoplasmic reticulum (ER).

95

96 **Fig 1. Development of a CRISPR/Cas9 *cdipt* mutant zebrafish.**

97 **A)** Schematic representation of phosphoinositide signaling pathway. CDIPT  
98 catalyzes the addition of the *myo*-inositol to the CDP-DAG to generate PI, which  
99 is the base precursor for all species of PIPs. **B)** Schematic representing exon  
100 organization of *cdipt*. Exon 3 was targeted by CRISPR/Cas9 gene editing. **C)**  
101 Sanger sequencing of wildtype (WT) and homozygous *cdipt* mutant (MUT) larvae  
102 showing a 10-bp deletion in exon 3 of *cdipt*. **D)** Fold change of mRNA levels  
103 between WT and MUT fish at both 3 dpf and 6 dpf. There is a significant change  
104 in *cdipt* mRNA levels between WT and MUT zebrafish at both 3 dpf (0.5-fold  
105 reduction; \*p=0.0035) and 6 dpf (0.6-fold reduction; \*\*p=0.0073). Each replicate  
106 is represented by a point, n = 30 per replicate; Student's *t* test, 2-tailed. Error  
107 bars indicate SEM.

108

109 Previous study of a zebrafish *cdipt* mutant revealed a liver phenotype reminiscent of  
110 phenotypes seen in other models of PIP dysregulation (Thakur et al., 2011). This study,  
111 however, did not examine skeletal muscle. In the current study, we examine the skeletal  
112 muscle in a new *cdipt* mutant. We show that loss of CDIPT has no effect on early  
113 muscle development, suggesting that skeletal myogenesis does not require *de novo*  
114 PIP synthesis. Instead, CDIPT appears to be required for proper formation of the triad.

115

## 116 **Materials and methods**

117

### 118 **Zebrafish maintenance**

119 Zebrafish stocks were maintained at the Zebrafish Facility at the Hospital for Sick  
120 Children, Toronto, ON, Canada. All zebrafish procedures were performed in compliance  
121 with the Animals for Research Act of Ontario and the Guidelines of the Canadian  
122 Council on Animal Care.

123

### 124 **Generation of zebrafish *cdipt* mutants**

125 A detailed procedure for CRISPR/Cas9 editing in zebrafish has been described  
126 previously (Ma et al., 2016). The *cdipt* target in this study was 5'-  
127 GGTTCCACCAGCAAACACATGGTGG-3' in exon 3. One-cell-stage AB WT embryos  
128 were injected with gRNA and Cas9 mRNA with a Picopump (World Precision  
129 Instruments). Potential founders (F<sub>0</sub>) were outcrossed to AB WT fish. Genomic DNA  
130 was isolated from single F<sub>1</sub> embryos at 6 dpf and genotyped using high resolution melt  
131 (HRM) analysis. A *cdipt* sequence spanning the CRISPR/Cas9 target site was amplified  
132 with the following primers: F: 5'-AGCTGGAACAGAAAAGTGTAGGA-3'; and R: 5'-  
133 TAGGTACAAAATTTGGTGCAATG-3'. Carriers were identified and outcrossed  
134 ultimately to the F<sub>3</sub> generation. In-cross progeny from the F<sub>3</sub> and F<sub>4</sub> generations were  
135 characterized in this study.

136

## 137 **Real-time PCR (qPCR)**

138 RNA was extracted from 3 dpf and 6 dpf *cdipt* mutant zebrafish and their wildtype  
139 siblings using RNAeasy (Qiagen). RNA samples were reverse transcribed into cDNA  
140 using the iScript cDNA synthesis kit (BioRad). Primers were designed to result in a  
141 product spanning exons 4-6 of *cdipt*: F: 5'-ACCCCATTTTACGGCTGTACT-'3; and R:  
142 5'-TACCTGGGGTTCTTCGATGT-'3. Products were amplified using Step-One-Plus  
143 Real-Time PCR System (Applied Biosystems). The zebrafish beta-actin gene, *actb1*,  
144 was used as an endogenous control.

145

## 146 **Birefringence**

147 Tricaine-anaesthetised larvae were mounted in 3% methylcellulose on glass slides and  
148 imaged under polarized light on a dissecting microscope (Olympus SZX7).

149

## 150 **Skeletal myofiber preparations**

151 Myofiber preparations of 6 dpf wildtype and *cdipt* mutant zebrafish were made following  
152 the protocol described previously (Horstick et al., 2013).

153

## 154 **Immunofluorescence staining**

155 Immunostaining of myofiber preparations was performed as previously described  
156 (Horstick et al., 2013). Briefly, myofiber preparations were fixed with 4% PFA, for 20



157 min, permeabilized with PBST (0.3% TritonX in PBS), blocked for 1 hour with PBSTB  
158 (5% BSA in PBT) and incubated overnight at 4°C with primary antibodies. The following  
159 primary antibodies were used: mouse anti-DHPR (1:200; DHPRa1A; Abcam), mouse  
160 anti- $\alpha$ -Actinin (1:100; Sigma), mouse anti-RyR1 (1:100; 34C; DSHB), rabbit anti-Junctin  
161 (1:350; gift from Dulhunty lab), mouse anti-PI(3)P (1:100; Echelon Biosciences Inc.),  
162 mouse anti-PI(3,4)P2 (1:100; Echelon Biosciences Inc.), mouse anti-PI(4,5)P2 (1:100;  
163 Echelon Biosciences Inc.). Alexa Fluor-conjugated secondary antibodies were used at  
164 1:1000 (Invitrogen). Rhodamine phalloidin (Phalloidin 555) was used to visualize  
165 filamentous actin (1:300, Molecular Probes). Preparations were mounted with ProLong  
166 Gold with DAPI (Invitrogen). Images were acquired with a Nikon Eclipse Ti laser  
167 scanning confocal using NIS Elements software (company, location) and only adjusted  
168 for brightness and contrast using Adobe Photoshop.

169

## 170 **Live confocal imaging**

171 One-cell stage zebrafish embryos were injected with 10 pg of a cDNA construct  
172 containing a fluorescent protein attached to a PIP-binding protein domain [Bodipy-PI  
173 (Echelon Biosciences Inc)]; PLC- $\beta$ -PH-GFP (Tobias Meyer Lab, Stanford University,  
174 CA) using a Picopump (World Precision Instruments). At 1 dpf, injected zebrafish were  
175 incubated in 0.2 mM phenylthiourea to prevent pigment formation. To image, zebrafish  
176 were screened for fluorescent myofibers on a macroscope (Zeiss Axio Zoom) and  
177 mounted in 1.5% low-melt agarose on a 3 cm glass-bottom petri dish. All confocal

178 images were taken with a Nikon Eclipse Ti confocal microscope using a 40x oil-  
179 immersion lens.

180

## 181 **Transmission electron microscopy**

182 Zebrafish clutches at 6 dpf were anaesthetised in tricaine and fixed in Karnovsky's  
183 fixative overnight at 4°C. Samples were sent to the Advanced Bioimaging Center  
184 (Sickkids Peter Gilgan Centre for Research and Learning, Toronto) where larvae were  
185 processed. Briefly, larvae were rinsed in buffer, post-fixed in 1% osmium tetroxide in  
186 buffer, dehydrated, and embedded in Quetol-Spurr resin. Following this, 70 nm sections  
187 thick were cut with a Leica UC7 ultramicrotome, stained with uranyl acetate and lead  
188 citrate, and viewed either with an FEI Tecnai 20 transmission electron microscope  
189 (Tecnai, Oregon, USA) (Bioimaging Facility at The Hospital for Sick Children, Toronto)  
190 or with a JEOL JEM 1200EX TEM (JEOL, Massachusetts, USA) (Electron Microscopy  
191 Facility at the Laboratory of Pathology, The Hospital for Sick Children, Toronto). Images  
192 were obtained using Gatan Digital Micrograph acquisition software or AmtV542, and  
193 were manipulated only for brightness and contrast using Adobe Photoshop.

194

## 195 **Immuno-electron microscopy**

196 6 dpf zebrafish embryos were anaesthetised in tricaine and fixed for 2h at room  
197 temperature followed by overnight fixation at 4°C in 4% PFA, 0.1% glutaraldehyde in  
198 0.1M sodium cacodylate buffer with 0.2M sucrose. Samples were rinsed in 0.1M sodium

199 cacodylate buffer and dehydrated in ethanol series (70% ethanol for 1h at 4°C; 90%  
200 ethanol for 1h at 20°C; 100% ethanol for 1h at -20°C, twice). Samples were then  
201 embedded in 50/50 LR White resin/ethanol for 1h at -20°C, followed by 70/30 LR White  
202 resin/ethanol for 1h at -20°C and 100% LR White resin for 1h at -20°C. Samples were  
203 then left overnight at -20°C in 100% LR White resin. Embryos were then placed in  
204 capsules filled with LR White resin mixed with benzoin methyl ether (0.1 g in 100 ml LR  
205 White), sealed, and placed in the oven for polymerization at 65°C for at least 72h.

206 70 nm ultrathin sections were cut with a Leica UC7 ultramicrotome and placed on  
207 formvar-coated grids, which were then processed for gold labelled immunostaining.  
208 Grids were treated with 0.15M glycine in PBS for 15 minutes, rinsed with PBS, followed  
209 by Aurion blocking solution (Aurion, The Netherlands) for 15 minutes. Primary  
210 antibodies were diluted in 0.1% BSA-c (Aurion, The Netherlands) at the following  
211 concentrations: 1:25 mouse anti-PI(4,5)P<sub>2</sub>; 1:10 mouse anti-PI(3,4)P<sub>2</sub>; 1:10 mouse anti-  
212 PI(3)P (Echelon Biosciences, Inc.). Samples were incubated with primary antibodies for  
213 1h at room temperature. After rinsing the samples with PBS 5 x 5 minutes, these were  
214 incubated with 10nm gold-conjugated goat anti-mouse secondary antibody (1:10;  
215 Electron Microscope Sciences, Hatfield, PA) for 1h at room temperature. Samples were  
216 then rinsed 5 x 5 minutes with PBS, treated with 2% glutaraldehyde (in PBS) for 5  
217 minutes, rinsed 5 x 5 minutes with distilled water and air dried. Gold immunolabelled  
218 samples were counter-stained with uranyl acetate and lead citrate and viewed with a  
219 JEOL JEM 1200EX TEM (JEOL, Massachusetts, USA) (Electron Microscopy Facility at  
220 the Laboratory of Pathology, The Hospital for Sick Children, Toronto). Images were

221 obtained using AmtV542 software, and were manipulated only for brightness and  
222 contrast using Adobe Photoshop.

223

## 224 **Triad size measurement**

225 To determine total triad area ( $A1+A2+A3$ ), the following features were measured: area  
226 of T-tubule (A1), areas of the two terminal cisternae (A2, A3), the distance between the  
227 membranes of the two terminal cisternae (D1) and the width of the gap between the  
228 membrane of the terminal cisternae and the T-tubule membrane (\*). Measurements  
229 were done using the open source software Image J. Data and statistical analyses were  
230 performed using GraphPad Prism 8 (GraphPad Software Inc., San Diego, CA).

231

## 232 **Swim test and photoactivation assay**

233 All motor behaviour analysis was performed using Zebrabox software (Viewpoint,  
234 France) as previously described (Sabha et al., 2016). To perform the photoactivation  
235 assay, zebrafish were incubated for 5 min at 28.5°C with optovin 6b8 (ID 57051911;  
236 ChemBridge), an optovin analog (Kokel et al., 2013). Optovin is a reversible TRPA1  
237 ligand that elicits motor excitation following exposure to light. After incubation, the  
238 Zebrabox platform monitored larvae for 20 second cycles over 10 minutes. Parameters  
239 were set to capture 5 seconds of exposure to white light to elicit ambulatory movement,  
240 followed by 15 seconds of recovery behaviour in the dark. This was repeated 30 times,  
241 to get a total experiment time of 10 minutes. The average speed traveled during the 20

242 second cycle was used to compare groups (i.e., *cdipt* mutants vs. WT siblings). To  
243 perform the spontaneous swim assay, zebrafish in system water were followed for 1  
244 hour. Data were analyzed using statistics software (GraphPad Prism).

245

## 246 **Morpholino studies**

247 For knockdown of maternal *cdipt*, the following ATG-targeting MO was designed: 5'-  
248 CCGAGAGTTTCTTTCTTTGGACGGA-3' (GeneTools LLC). An MO designed to a  
249 random sequence (5'-CCTCTTACCTCAGTTACAATTTATA-3') with no homology by  
250 Basic Local Alignment Search Tool (BLAST) analysis in the zebrafish genome was used  
251 as a control (GeneTools LLC). Fertilized eggs were collected after timed matings of  
252 adult zebrafish and injected at the 1-cell stage using a Picopump (World Precision  
253 Instruments). Embryos were injected with concentrations ranging from 0.15 – 0.5 mM in  
254 a volume of 1 nl.

## 256 **Results**

257

### 258 **Developing a new *cdipt* mutant zebrafish line**

259 Exon 3 of the *cdipt* gene was targeted using the CRISPR/Cas9 system (Fig 1B). A 10  
260 bp deletion allele, hereafter referred to as *cdipt* mutant when present in homozygosity,  
261 was identified after Sanger sequencing (Fig 1C). Due to lack of commercially available  
262 antibodies against zebrafish CDIPT, we performed real-time PCR (qPCR) on total RNA  
263 from whole embryos to confirm that *cdipt* transcript is reduced by this mutation. There  
264 was a significant difference in *cdipt* mRNA levels between wildtype (WT) and mutants at  
265 both 3 dpf and 6 dpf (Fig 1D) ( $P < 0.05$ ,  $n = 30$ ). This suggests that mutant *cdipt* mRNA  
266 transcripts are being directed to the nonsense-mediated decay pathway, and is  
267 consistent with this mutation being a loss of expression and function allele.

268

### 269 ***cdipt* zebrafish exhibit morphological and gastrointestinal** 270 **system abnormalities**

271 Homozygous *cdipt* mutant fish appeared phenotypically normal until 5 dpf, when  
272 gastrointestinal system abnormalities are visible with bright-field microscopy. The  
273 mutant phenotype is fully penetrant at 6 dpf and includes a dark, globular liver and small  
274 intestine, partial deterioration of the ventral fin (folds, incisions, missing areas), tissue  
275 degradation around the cloaca, and abnormal jaw structure (Fig 2A and S1 Fig). The

276 gastrointestinal features are reminiscent of the mutant *cdipt*<sup>hi559/hi559</sup> phenotype, and  
277 have already been well characterized (Thakur et al., 2011).

278

279 **Fig 2. Characterization of the *cdipt* mutant phenotype at 6dpf.**

280 **A)** *cdipt* mutant zebrafish exhibit a gastrointestinal phenotype with a dark,  
281 globular and oversized liver (yellow outline) and a small intestine (yellow arrows),  
282 abnormal jaw structure (black arrows), tissue degradation around the cloaca  
283 (black arrowhead), and defective ventral fin (yellow arrowhead). **B)**  
284 Representative image of *cdipt* mutants at 6dpf, showing normal birefringence  
285 pattern indistinguishable from WT siblings, indicative of normal sarcomere  
286 organization. **C)** Confocal micrographs showing localization by indirect  
287 immunofluorescence of actin (upper panels), DHPR (middle panels) and  $\alpha$ -  
288 actinin (bottom panels) in the skeletal myofibers. There is no noticeable  
289 difference in the localization of these proteins between WT (left column) and  
290 *cdipt* mutant (right column). Insets represent high magnification of areas  
291 surrounded by white rectangles. Scale bars = 5  $\mu$ m.

292

293 ***cdipt* zebrafish have generally normal muscle structure**

294 Gross morphology of *cdipt* zebrafish muscle was investigated using birefringence.  
295 Birefringence uses polarized light to assess muscle integrity. Organized skeletal muscle  
296 will appear bright amidst a dark background when visualized between two polarized  
297 light filters, whereas disorganized muscle exhibits degenerative dark patches and an

298 overall decrease in brightness in some myotomes. Based on birefringence analysis,  
299 *cdipt* zebrafish have normal muscle integrity and sarcomere organization at all ages  
300 examined (Fig 2B).

301 We next studied the localization of several sarcomeric proteins, such as actin, myosin  
302 (contractile proteins), dihydropyridine receptor (DHPR), ryanodine receptor type 1  
303 (RyR1) and junctin (markers for triads), laminin and dystrophin (markers for  
304 myotendinous junctions), and  $\alpha$ -actinin (a Z-line marker). Immunostaining with  
305 antibodies against these proteins on myofibers isolated from 6dpf zebrafish showed no  
306 differences in localization between WT and *cdipt* mutants (Fig 2C and S2 Fig),  
307 indicating no qualitative defects in the formation and organization of key muscle  
308 structures.

309 We next studied the ultrastructure of muscle, given that abnormal triad formation is a  
310 hallmark of many PIP-related myopathies and may not be appreciated by light  
311 microscopy. *cdipt* larvae and their WT siblings were thus processed at 6 dpf for  
312 transmission electron microscopy. Electron micrographs revealed no major  
313 abnormalities in triad structure in *cdipt* mutants (Fig 3A,B). To better characterize the  
314 triads we measured the area of T-tubules (A1), the areas of the two terminal cisternae  
315 (A2, A3), total triad area (A1+A2+A3), the distance between the membranes of the two  
316 terminal cisternae of the sarcoplasmic reticulum (D1), and the width of the gap between  
317 the T-tubule and each of the two terminal cisternae (\*), where the junctional feet  
318 corresponding to the ryanodine receptor-dihydropyridine receptor complex are found  
319 (Al-Qusairi and Laporte, 2011) (Fig 3C). There was no significant difference in the total  
320 area of the triad (A1+A2+A3) (Fig 3D). However, the T-tubule area (A1) was



321 qualitatively slightly smaller in the *cdipt* mutant as compared to WT, and the distance  
322 between terminal cisternae at maximum distance (D1) and the gap width (\*) were  
323 quantitatively and significantly smaller in *cdipt* mutants (Fig 3D).

324

### 325 **Fig 3. Skeletal muscle ultrastructure.**

326 **A-B)** Transmission electron micrographs show normal skeletal muscle  
327 ultrastructure in *cdipt* larvae. T-tubules (insets; black arrow) are apposed by  
328 terminal cisternae of sarcoplasmic reticulum (insets; white arrow). **C)** Diagram  
329 illustrating triad structure and features used for measurements: A1 = T-tubule  
330 area; A2 and A3 = terminal cisternae (TC) areas; D1 = maximum distance  
331 between TCs; \* = gap width (distance between TC membrane and T-tubule  
332 membrane). **D)** There is no significant difference in the triad area between WT  
333 and *cdipt* mutant larvae (A1+A2+A3 graph) (n = 36, p = 0.9217). The T-tubule  
334 area (A1 graph) is qualitatively slightly smaller in the *cdipt* mutant than in WT  
335 (n=36; P=0.5246), whereas the distance between cisternae at maximum distance  
336 (D1 graph) (n = 36, p < 0.0001) and the gap width (\* graph) (n = 44, p < 0.0001)  
337 are significantly smaller in *cdipt* mutants than in WT. Scale bars = 200 nm.

338

## 339 ***cdipt* zebrafish have abnormal motor behaviour as compared** 340 **to wildtype siblings**

341 Given the subtle but significant change observed in the appearance of the triad, we  
342 wanted to determine if there was any alteration in muscle function. To assess muscle

343 function, we performed a spontaneous swim test assay and a routine photoactivation  
344 movement assay previously utilized by our lab (Sabha et al., 2016). The latter involved  
345 incubating zebrafish larvae with a molecule called optovin 6b8, which when exposed to  
346 white light, will activate zebrafish muscle through a reflex arc. If muscle function is  
347 impaired, mutants will have reduced movement when compared to WT. We did thirty  
348 rounds of 20 second-activation periods to assess both the speed of movement and  
349 muscle fatigue. The average speed of movement was significantly lower in *cdipt* mutant  
350 zebrafish both in the spontaneous swim test (Fig 4A,B) and in their response to optovin  
351 (Fig 4C,D). In addition, *cdipt* mutants spent less time moving (S3A Fig) and covered  
352 shorter distances than their WT siblings (S3B Fig). The rate of fatigue, however, was  
353 similar in the *cdipt* mutant and WT zebrafish (Fig 4D).

354

355 **Fig 4. *cdipt* mutants have significantly impaired motor function compared**  
356 **to their wildtype siblings.**

357 **A)** Spontaneous swim movement was assessed by tracking 5-days or 6-days old  
358 zebrafish larvae over 1 hour. Representative examples of tracking plots of  
359 individual larvae movement. Black represents slow movement (<5 mm/s), green  
360 represents average speed (5-20 mm/s), and red represents fast movement (>20  
361 mm/s). **B)** The *cdipt* mutant larvae are significantly slower than their WT siblings,  
362 both at 5dpf (WT n = 22, *cdipt* n = 26, p = 0.0318) and 6dpf (WT n = 36, *cdipt* n =  
363 28, p = 0.0036). **C)** Involuntary motor function was assessed using an optovin-  
364 stimulated movement assay in response to pulses of light. Representative  
365 examples of tracking plots of individual larvae showing movement over 20

366 seconds, involving 5 seconds of white light exposure followed by 15 seconds of  
367 darkness. **D)** There is a significant difference between the average speed  
368 travelled by WT zebrafish compared to *cdipt* mutant zebrafish (n = 18 and 14,  
369 respectively; p < 0.0001, Student's *t* test, 2-tailed). WT and *cdipt* mutant  
370 zebrafish plateau at the same rate (n = 7, p=0.3487).

371

## 372 ***cdipt* zebrafish do not show changes in the localization of**

### 373 **PIPs**

374 Given that CDIPT is the rate-limiting enzyme for PI synthesis (the precursor for all  
375 PIPs), we looked at the expression and localization of several species of PIPs in  
376 myofibers. We specifically investigated PI3P, PI(3,4)P2 and PI(4,5)P2 localization.  
377 PI(4,5)P2 and PI(3,4)P2 are found mostly at the plasma membrane, whereas PI3P is  
378 mostly found on endosomes (Viaud et al., 2016). Immunofluorescence staining with  
379 anti-PIP antibodies revealed no significant differences in the localization of PI(4,5)P2,  
380 PI3P, PI(3,4)P2 (Fig 5). To further investigate PI(4,5)P2 localization in *cdipt* larvae *in*  
381 *vivo*, a fluorescent marker for PI(4,5)P2 (PLC $\delta$ PH-GFP) was injected into 1-cell stage  
382 *cdipt* embryos. At 6 dpf, PI(4,5)P2 appeared to properly localize to the plasma  
383 membrane (Fig 5A,A'). These results were further supported by immunoelectron  
384 microscopy studies. Nanogold-labelled antibodies against PI3P, PI(3,4)P2 and  
385 PI(4,5)P2 localized at the triad and its vicinity and showed similar localization pattern in  
386 WT and *cdipt* mutant embryos (Fig 6).

387

388 **Fig 5. Localization of PIPs by immunofluorescence in wildtype and *cdipt***  
389 **mutant zebrafish.**

390 Confocal micrographs showing localization of PIPs is not affected in early larval  
391 development of *cdipt* mutants. **(A, A')** visualization of skeletal muscle from live  
392 embryos injected with PLC $\delta$ PH-GFP, a marker for PI(4,5)P<sub>2</sub>. There was no  
393 obvious difference in expression between wild type (WT) and *cdipt* mutant  
394 embryos. **(B-D, B'-D')** Immunostaining with PIP antibodies of myofibers isolated  
395 from WT and *cdipt* mutants. Localization of PI(4,5)P<sub>2</sub> **(B, B')**, PI3P **(C, C')** and  
396 PI(3,4)P<sub>2</sub> **(D, D')** is similar in wildtype and *cdipt* zebrafish. Scale bars = 10 $\mu$ m.

397

398 **Fig 6. Localization of PIPs by immunoelectron microscopy in wildtype and**  
399 ***cdipt* mutant zebrafish.**

400 Transmission immunoelectron micrographs showing localization of nanogold-  
401 labelled antibodies against **(A, A')** PI(4,5)P<sub>2</sub>, **(B, B')** PI(3,4)P<sub>2</sub> and PI3P **(C, C')**  
402 (yellow arrowheads) at the skeletal muscle triad. There is no difference in  
403 localization of these antibodies between WT and *cdipt* mutant embryos. Scale  
404 bar = 100nm.

405

406 **Maternal *cdipt* mRNA and/or PI are sufficient for normal**  
407 **muscle development**

408 Given the importance of CDIPT in generating a precursor to all PIP species, it is  
409 surprising that there is no developmental phenotype in skeletal muscle. However, a  
410 previously published lipidomic analysis of the early zebrafish yolk found that PI is  
411 already present at 0 hpf (Fraher et al., 2016) and previous results on *cdipt*<sup>hi559/hi559</sup>  
412 zebrafish (Thakur et al., 2011) and our qPCR results (see Fig 1D) show there is  
413 maternal *cdipt* mRNA expression in early stages of the zebrafish embryo before zygotic  
414 gene expression is turned on.

415 To prevent production of CDIPT protein from maternal mRNA, we injected zebrafish  
416 embryos at one-cell stage with a translation blocking morpholino (ATG-MO). Injection of  
417 *cdipt* ATG-MO at both 0.3 mM and 0.5 mM caused increased levels of embryo death  
418 (S4A Fig), suggesting that blocking of maternal *cdipt* mRNA translation is broadly  
419 detrimental for embryogenesis. While we were not able to study muscle in the majority  
420 of *cdipt* ATG morphants due to early lethality, some morphants did survive beyond the  
421 first day post fertilization (S4B Fig). In those morphants, the skeletal muscle  
422 development was not obviously affected.

423 To investigate whether maternally deposited PI in the yolk can be delivered to  
424 developing skeletal muscle, we injected BODIPY-labelled PI into yolk at the one-cell  
425 stage. Fluorescence was tracked with a confocal microscope over several days. By 1  
426 dpf, the fluorescent probes appeared in the skeletal muscle compartment (S5 Fig).  
427 Fluorescence was not detectable at 2 days post-injection and later. These results  
428 suggest that PI present in the yolk at early stages can be delivered to skeletal muscle.  
429 Taken together, our data suggest that the presence of maternally deposited mRNA in  
430 the cell and/or PI in the yolk fulfill the early developmental requirements for CDIPT and

431 for PI, which is consistent with the lack of a phenotype until the yolk is depleted at 5 dpf.  
432 This also suggests that once PI and its PIP derivatives are generated, they likely persist  
433 as a stable pool in skeletal muscle.

## 434 Discussion

435 To investigate the role of PIPs in muscle development, we developed and characterized  
436 a new *cdipt* mutant zebrafish. This mutant showed defects in fin morphology and  
437 aberrant swimming behaviour, in addition to the gastrointestinal defects previously  
438 reported in another *cdipt* mutant [*cdipt*<sup>hi559/hi559</sup>, (Thakur et al., 2011)].

439 The purpose of generating this model was to determine how the potential loss of all  
440 seven PIP species would affect muscle development. We expected that loss of CDIPT  
441 and the subsequent depletion of PI would have severe effects on skeletal muscle;  
442 however, mutant *cdipt* larvae showed only minimal abnormalities in muscle structure  
443 and overall muscle function. We hypothesize that this modest phenotype is the result of  
444 PI deposited in the muscle during embryogenesis that then provides sufficient substrate  
445 for generation and maintenance of PIP species at subsequent developmental stages.

446 Given the importance of CDIPT in generating a precursor to all PIP species, it is  
447 surprising that there is no significant adverse phenotype in muscle. The lack of  
448 widespread abnormalities may be because *cdipt* mRNA and PIs are maternally  
449 deposited into zebrafish yolk. Depletion of maternal mRNA using a translation-blocking  
450 morpholino resulted in increased mortality in the zebrafish, consistent with a role for  
451 CDIPT and de novo PI synthesis in embryogenesis. However, the impact of the  
452 translation-blocking morpholino did not seem to affect skeletal muscle development in  
453 the surviving injected embryos, suggesting that maternally deposited CDIPT does not  
454 play a role in myogenesis. There is likely also an important contribution to total embryo  
455 PI from maternal deposition of this precursor lipid in the yolk. In order to remove this

456 potential confounder to the assessment of CDIPT function in skeletal muscle, we would  
457 need to prevent the deposition of PI into the yolk, or develop a method of depleting yolk  
458 PI without disrupting other essential nutrients contained within the yolk. Currently, there  
459 are no technologies that would allow us to complete either of those experiments. We  
460 attempted to use direct lipase injection into the yolk in order to deplete it, but this  
461 resulted in embryonic lethality prior to myogenesis.

462 The one part of the muscle where we did observe abnormalities was the triad. We  
463 showed by immunofluorescence that several species of PIPs localize to the sarcomere.  
464 Moreover, our novel immunoelectron microscopy studies showed these molecules  
465 localize to the triad. To our knowledge, this is the first report on ultrastructural  
466 localization of PI3P, PI(3,4)P2 and PI(4,5)P2 at the triad in a vertebrate model, as  
467 previous studies focused on culture cells (Watt et al., 2002) (Tabellini et al., 2003)  
468 (Mayhew et al., 2004) (Wegner et al., 2014) (Pastorek et al., 2016). Our data add to the  
469 growing evidence showing the importance of PIP metabolism in the development and  
470 maintenance of this key muscle substructure. Work with mammalian myocytes in culture  
471 has implicated PIP2 (via its binding to BIN1) in the formation of the T-tubule. While we  
472 did not see an overall decrease in PIP2 levels, nor in its localization, it is tempting to  
473 speculate that the loss of CDIPT sufficiently impacted PIP synthesis enough to result in  
474 mild by critical reductions in PIP2 that were enough to alter triad formation. Future  
475 studies will be required to fully explore this relationship.

476 Of note, phenotypic abnormalities in *cdipt* mutants do not appear until 5 dpf, shortly  
477 after the yolk has been depleted. The most prominent of these is the digestive system  
478 phenotype, likely reflecting a requirement for *de novo* PIP synthesis in this organ



479 system, since pools of PI are locally made and used almost immediately after synthesis  
480 (Varnai and Balla, 2006). However, because skeletal muscle has no phenotype at 5 dpf  
481 and previous data has shown that *cdipt* mRNA is not present in skeletal muscle after 5  
482 dpf (Varnai and Balla, 2006), it is possible that maturing skeletal muscle does not  
483 require *de novo* PIP synthesis. Instead, perhaps PIPs are maintained in pools that can  
484 fluctuate between the different species when needed. Alternatively, a requirement for  
485 PIP synthesis in muscle may not manifest in the window of time after yolk depletion and  
486 before mutant death, but may develop as the muscle continues to grow and mature.  
487 Muscle specific targeting of *cdipt* would be helpful in the future to distinguish between  
488 these possibilities.

489 Of note, the most obvious phenotypes in the *cdipt* mutants are in the liver,  
490 gastrointestinal system, and the fin. Interestingly, these phenotypes of the *cdipt* mutants  
491 are also visible in *mtm1* mutant zebrafish (Sabha et al., 2016). The fact that two  
492 mutated PIP-related genes cause similar defects suggest that PIP metabolism must be  
493 tightly regulated in these tissues in zebrafish development, and that there is an  
494 increased requirement for *de novo* synthesis and homeostatic balance.

495

## 496 **Acknowledgements**

497 The authors gratefully thank Jonathan Volpatti, Yukari Endo and Mo Zhao (Dowling  
498 Lab) for useful discussions and insightful suggestions; Evangelina Aristegui for technical  
499 support; Scott Knox, Alejandro Salazar, and Elyjah Schimmens for zebrafish care  
500 (SickKids Zebrafish Facility); Paul Paroutis and Kimberley Lau for technical support  
501 (SickKids Imaging Facility); and Doug Holmyard, Ali Darbandi and William Martin  
502 (SickKids Nanoscale Biomedical Imaging Facility) for help with TEM and immunoEM  
503 sample preparation. The authors also thank the following people for generously  
504 providing reagents: Angela Dulhunty (John Curtin School of Medical Research,  
505 Australian National University, Canberra, Australia) for anti-Junctin antibody; Tobias  
506 Meyer Lab (Stanford University, CA) for the PLC- $\delta$ PH-GFP construct; Sergio Grinstein  
507 and Julie Brill (The Hospital for Sick Children, Toronto, Canada) for PIP constructs and  
508 for helpful discussion.

## 509 References

- 510 Al-Qusairi, L., and J. Laporte. 2011. T-tubule biogenesis and triad formation in skeletal muscle  
511 and implication in human diseases. *Skelet Muscle*. 1:26.
- 512 Amoasii, L., D.L. Bertazzi, H. Tronchere, K. Hnia, G. Chicanne, B. Rinaldi, B.S. Cowling, A. Ferry, B.  
513 Klaholz, B. Payrastre, J. Laporte, and S. Friant. 2012. Phosphatase-dead myotubularin  
514 ameliorates X-linked centronuclear myopathy phenotypes in mice. *PLoS Genet*.  
515 8:e1002965.
- 516 Balla, T. 2013. Phosphoinositides: Tiny Lipids With Giant Impact on Cell Regulation.  
517 *Physiological Reviews*. 93:1019-1137.
- 518 Bunney, T.D., and M. Katan. 2010. Phosphoinositide signalling in cancer: beyond PI3K and PTEN.  
519 *Nat Rev Cancer*. 10:342-352.
- 520 De Camilli, P., S.D. Emr, P.S. McPherson, and P. Novick. 1996. Phosphoinositides as regulators in  
521 membrane traffic. *Science*. 271:1533-1539.
- 522 De Matteis, M.A., and A. Godi. 2004. PI-loting membrane traffic. *Nat Cell Biol*. 6:487-492.
- 523 Dowling, J.J., M.W. Lawlor, and R.T. Dirksen. 2014. Triadopathies: an emerging class of skeletal  
524 muscle diseases. *Neurotherapeutics*. 11:773-785.
- 525 Dowling, J.J., A.P. Vreede, S.E. Low, E.M. Gibbs, J.Y. Kuwada, C.G. Bonnemann, and E.L.  
526 Feldman. 2009. Loss of Myotubularin Function Results in T-Tubule Disorganization in  
527 Zebrafish and Human Myotubular Myopathy. *PLoS Genetics*. 5:e1000372.
- 528 Fraher, D., A. Sanigorski, N.A. Mellett, P.J. Meikle, A.J. Sinclair, and Y. Gibert. 2016. Zebrafish  
529 Embryonic Lipidomic Analysis Reveals that the Yolk Cell Is Metabolically Active in  
530 Processing Lipid. *Cell Rep*. 14:1317-1329.
- 531 Frost, A., V.M. Unger, and P. De Camilli. 2009. The BAR domain superfamily: membrane-  
532 molding macromolecules. *Cell*. 137:191-196.
- 533 Gibbs, E.M., E.J. Horstick, and J.J. Dowling. 2013. Swimming into prominence: the zebrafish as a  
534 valuable tool for studying human myopathies and muscular dystrophies. *FEBS J*.  
535 280:4187-4197.
- 536 Gonorazky, H.D., C.G. Bonnemann, and J.J. Dowling. 2018. The genetics of congenital  
537 myopathies. *In Handbook of Clinical Neurology*. Vol. 148. Elsevier. 549-564.
- 538 Horstick, E.J., E.M. Gibbs, X. Li, A.E. Davidson, and J.J. Dowling. 2013. Analysis of embryonic and  
539 larval zebrafish skeletal myofibers from dissociated preparations. *J Vis Exp*:e50259.
- 540 Jungbluth, H., S. Treves, F. Zorzato, A. Sarkozy, J. Ochala, C. Sewry, R. Phadke, M. Gautel, and F.  
541 Muntoni. 2018. Congenital myopathies: disorders of excitation-contraction coupling and  
542 muscle contraction. *Nat Rev Neurol*. 14:151-167.
- 543 Kokel, D., C.Y. Cheung, R. Mills, J. Coutinho-Budd, L. Huang, V. Setola, J. Sprague, S. Jin, Y.N. Jin,  
544 X.P. Huang, G. Bruni, C.J. Woolf, B.L. Roth, M.R. Hamblin, M.J. Zylka, D.J. Milan, and R.T.  
545 Peterson. 2013. Photochemical activation of TRPA1 channels in neurons and animals.  
546 *Nat Chem Biol*. 9:257-263.
- 547 Lo Vasco, V.R. 2018. The Phosphoinositide Signal Transduction Pathway in the Pathogenesis of  
548 Alzheimer's Disease. *Curr Alzheimer Res*. 15:355-362.

- 549 Lykidis, A., P.D. Jackson, C.O. Rock, and S. Jackowski. 1997. The role of CDP-diacylglycerol  
550 synthetase and phosphatidylinositol synthase activity levels in the regulation of cellular  
551 phosphatidylinositol content. *J Biol Chem.* 272:33402-33409.
- 552 Ma, A.C., Y. Chen, P.R. Blackburn, and S.C. Ekker. 2016. TALEN-Mediated Mutagenesis and  
553 Genome Editing. *Methods Mol Biol.* 1451:17-30.
- 554 Mayhew, T.M., G. Griffiths, and J.M. Lucocq. 2004. Applications of an efficient method for  
555 comparing immunogold labelling patterns in the same sets of compartments in different  
556 groups of cells. *Histochem Cell Biol.* 122:171-177.
- 557 Nance, J.R., J.J. Dowling, E.M. Gibbs, and C.G. Bonnemann. 2012. Congenital myopathies: an  
558 update. *Curr Neurol Neurosci Rep.* 12:165-174.
- 559 Nicholson, G., G.M. Lenk, S.W. Reddel, A.E. Grant, C.F. Towne, C.J. Ferguson, E. Simpson, A.  
560 Scheuerle, M. Yasick, S. Hoffman, R. Blouin, C. Brandt, G. Coppola, L.G. Biesecker, S.D.  
561 Batish, and M.H. Meisler. 2011. Distinctive genetic and clinical features of CMT4J: a  
562 severe neuropathy caused by mutations in the PI(3,5)P(2) phosphatase FIG4. *Brain.*  
563 134:1959-1971.
- 564 Pastorek, L., M. Sobol, and P. Hozak. 2016. Colocalization coefficients evaluating the  
565 distribution of molecular targets in microscopy methods based on pointed patterns.  
566 *Histochem Cell Biol.* 146:391-406.
- 567 Peter, B.J., H.M. Kent, I.G. Mills, Y. Vallis, P.J. Butler, P.R. Evans, and H.T. McMahon. 2004. BAR  
568 domains as sensors of membrane curvature: the amphiphysin BAR structure. *Science.*  
569 303:495-499.
- 570 Sabha, N., J.R. Volpatti, H. Gonorazky, A. Reifler, A.E. Davidson, X. Li, N.M. Eltayeb, C. Dall'Armi,  
571 G. Di Paolo, S.V. Brooks, A. Buj-Bello, E.L. Feldman, and J.J. Dowling. 2016. PIK3C2B  
572 inhibition improves function and prolongs survival in myotubular myopathy animal  
573 models. *J Clin Invest.* 126:3613-3625.
- 574 Tabellini, G., R. Bortul, S. Santi, M. Riccio, G. Baldini, A. Cappellini, A.M. Billi, R. Berezney, A.  
575 Ruggeri, L. Cocco, and A.M. Martelli. 2003. Diacylglycerol kinase-theta is localized in the  
576 speckle domains of the nucleus. *Exp Cell Res.* 287:143-154.
- 577 Thakur, P.C., C. Stuckenholtz, M.R. Rivera, J.M. Davison, J.K. Yao, A. Amsterdam, K.C. Sadler, and  
578 N. Bahary. 2011. Lack of de novo phosphatidylinositol synthesis leads to endoplasmic  
579 reticulum stress and hepatic steatosis in cdipt-deficient zebrafish. *Hepatology.* 54:452-  
580 462.
- 581 Varnai, P., and T. Balla. 2006. Live cell imaging of phosphoinositide dynamics with fluorescent  
582 protein domains. *Biochim Biophys Acta.* 1761:957-967.
- 583 Viaud, J., R. Mansour, A. Antkowiak, A. Mujalli, C. Valet, G. Chicanne, J.M. Xuereb, A.D. Terrisse,  
584 S. Severin, M.P. Gratacap, F. Gaits-Iacovoni, and B. Payrastre. 2016. Phosphoinositides:  
585 Important lipids in the coordination of cell dynamics. *Biochimie.* 125:250-258.
- 586 Volpatti, J.R., A. Al-Maawali, L. Smith, A. Al-Hashim, J.A. Brill, and J.J. Dowling. 2019. The  
587 expanding spectrum of neurological disorders of phosphoinositide metabolism. *Dis*  
588 *Model Mech.* 12.
- 589 Watt, S.A., G. Kular, I.N. Fleming, C.P. Downes, and J.M. Lucocq. 2002. Subcellular localization of  
590 phosphatidylinositol 4,5-bisphosphate using the pleckstrin homology domain of  
591 phospholipase C delta1. *Biochem J.* 363:657-666.

592 Wegner, C.S., K.O. Schink, H. Stenmark, and A. Brech. 2014. Monitoring phosphatidylinositol 3-  
593 phosphate in multivesicular endosome biogenesis. *Methods Enzymol.* 534:3-23.  
594

## 595 **Supplemental material**

596 **Fig. S1. Phenotypic variations in *cdipt* mutants. A-B)** Examples of fin degeneration  
597 (yellow arrowheads), oversized liver (yellow outline), and abnormal jaw structure (black  
598 arrows) in *cdipt* mutant zebrafish. **C)** Many *cdipt* mutants have partially folded ventral  
599 fin.

600 **Fig. S2. Localization of triad-associated proteins in the muscle.** Confocal  
601 micrographs showing localization by indirect immunofluorescence of RyR1 (top panels)  
602 and Junctin (bottom panels) in skeletal myofibers. There is no noticeable difference in  
603 localization of these proteins in WT (left panels) and *cdipt* mutant (right panels). Scale  
604 bars = 10  $\mu$ m.

605 **Fig. S3. *cdipt* mutants have impaired motor function. A)** *Cdipt* mutant zebrafish  
606 spend significantly less time swimming compared to their WT siblings, both at 5dpf (WT  
607  $n = 22$ , *cdipt*  $n = 26$ ,  $p = 0.0359$ ) and 6dpf (WT  $n = 36$ , *cdipt*  $n = 28$ ,  $p = 0.0209$ ). **B)**  
608 *Cdipt* mutant zebrafish travel significantly shorter distances compared to their WT  
609 siblings at 5dpf (WT  $n = 22$ , *cdipt*  $n = 26$ ,  $p = 0.0121$ ) whereas at 6dpf the travelled  
610 distances are not significantly different (WT  $n = 36$ , *cdipt*  $n = 28$ ,  $p = 0.1015$ ).

611 **Fig. S4. Blocking maternal *cdipt* mRNA translation is detrimental for**  
612 **embryogenesis. A)** Embryos injected with ATG-MO ( $n=115$ ) show significantly higher  
613 mortality rates than those injected with Ctrl-MO ( $n=117$ ). **B)** Surviving ATG-MO-injected  
614 *cdipt* embryos have a normal birefringence pattern indistinguishable from their WT  
615 siblings.

616 **Fig. S5. Maternally deposited PI in the yolk is transported to the muscle.** Zebrafish  
617 larvae at 1 dpf after injection of BODIPY-PI into yolk at the 1-cell stage (arrows indicate  
618 accumulation of fluorescently-labeled PI in the muscle).

# Figure 1

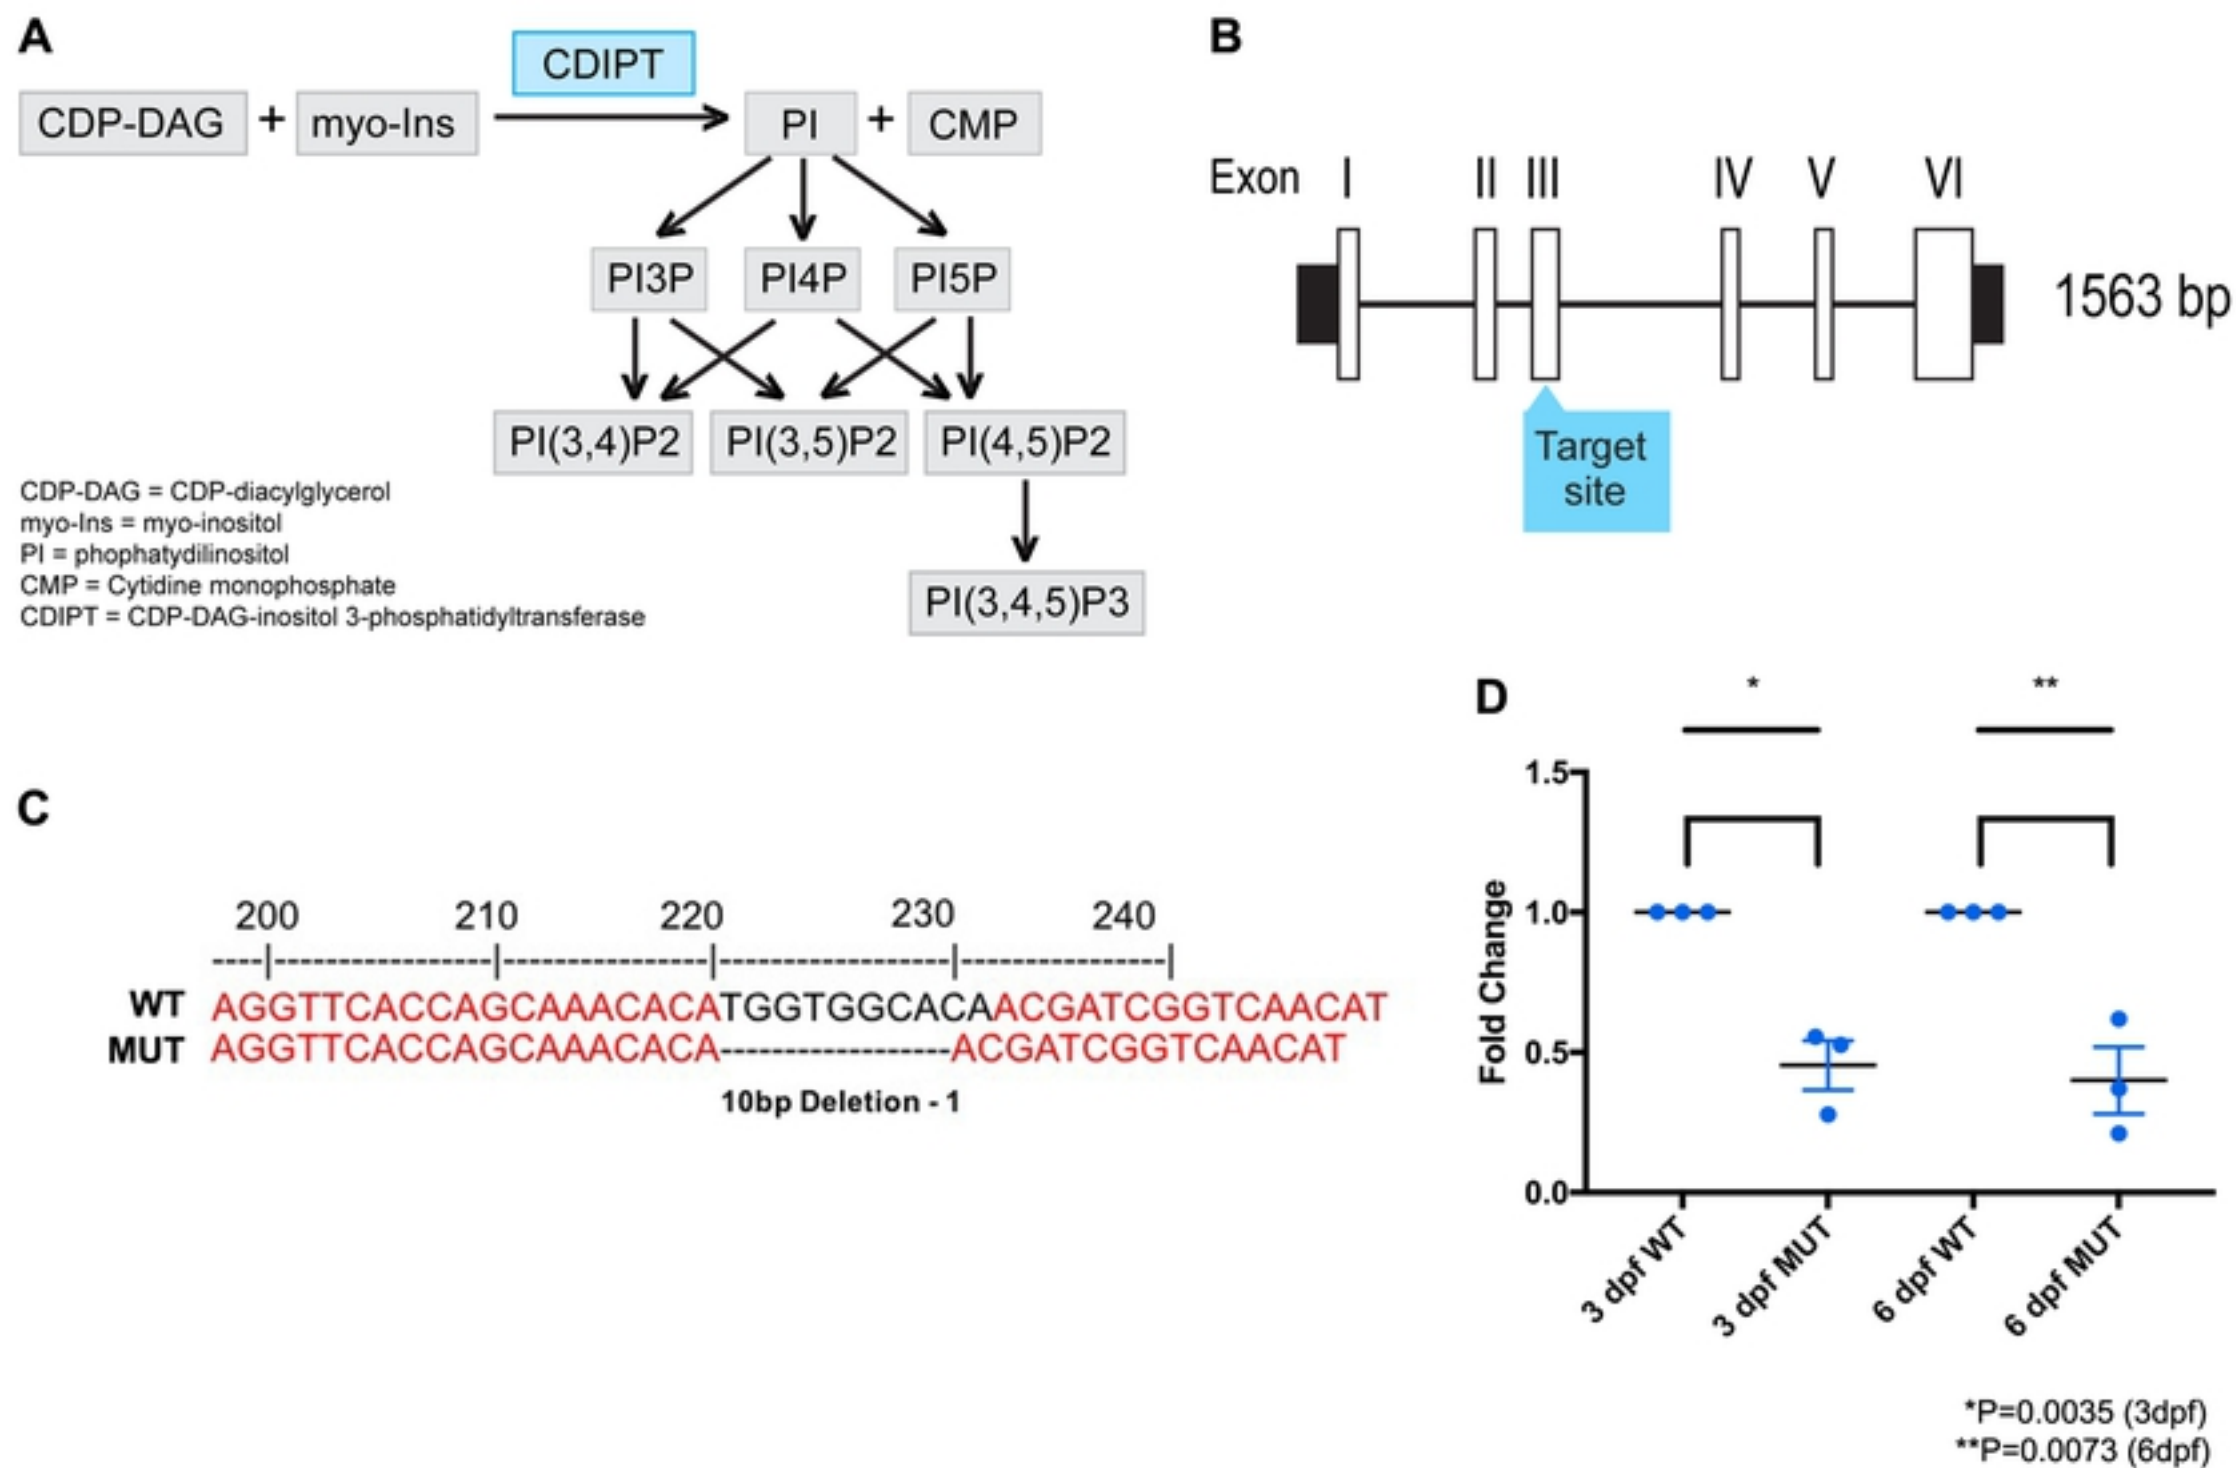



Figure 2

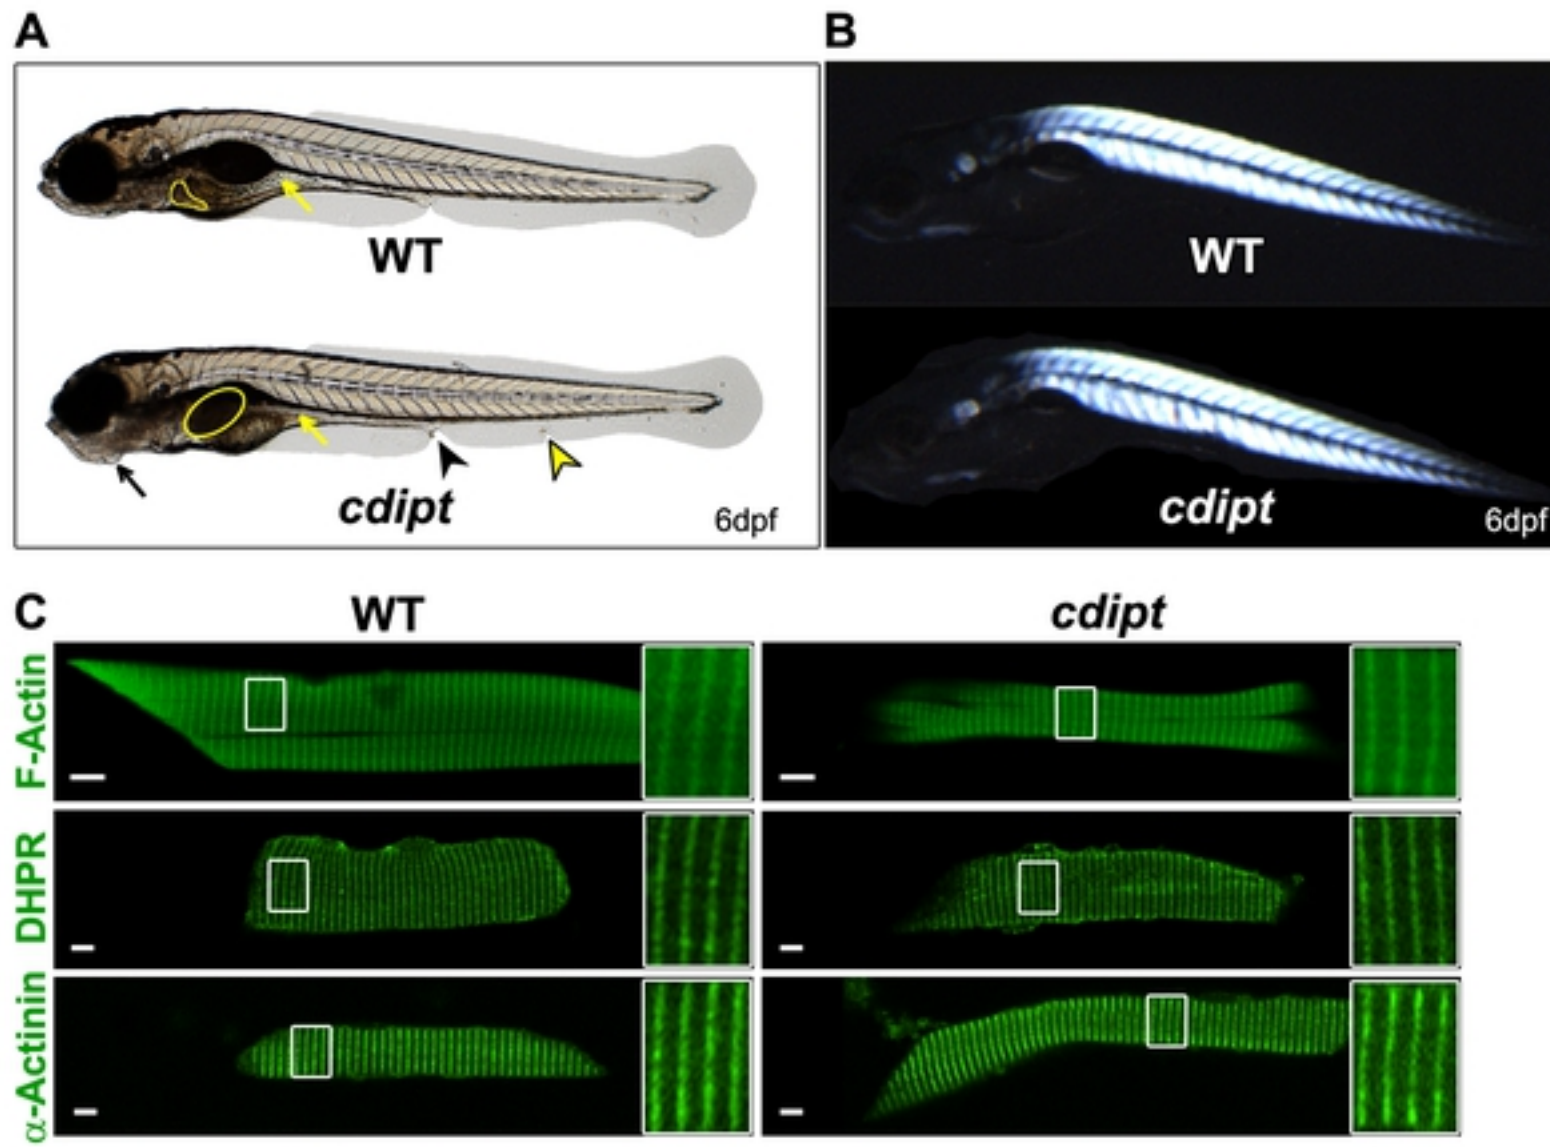

# Figure 3

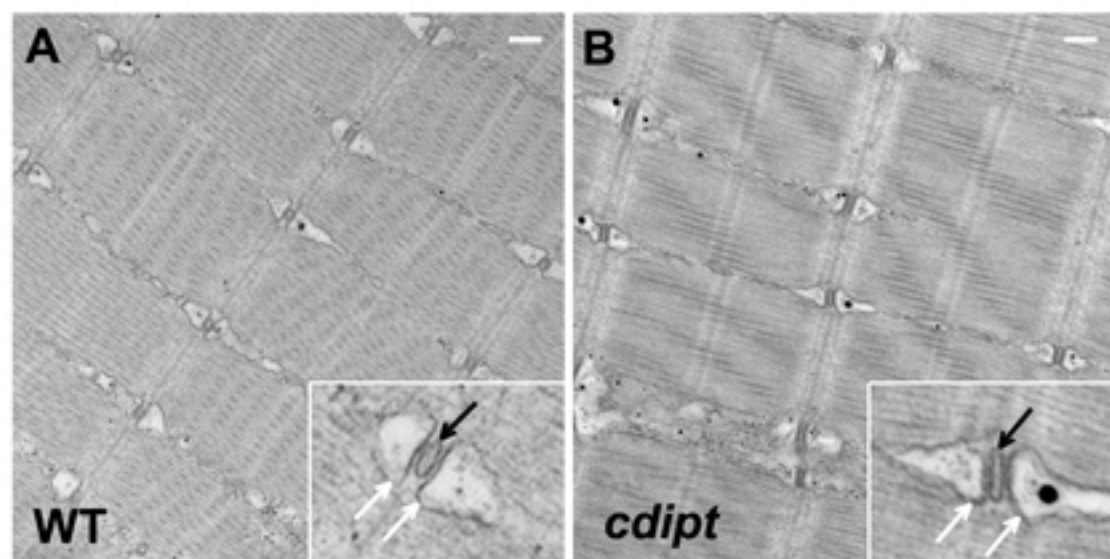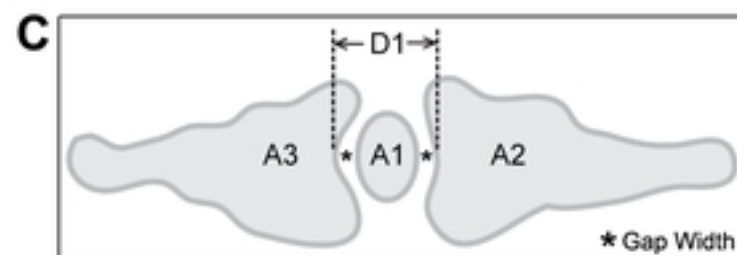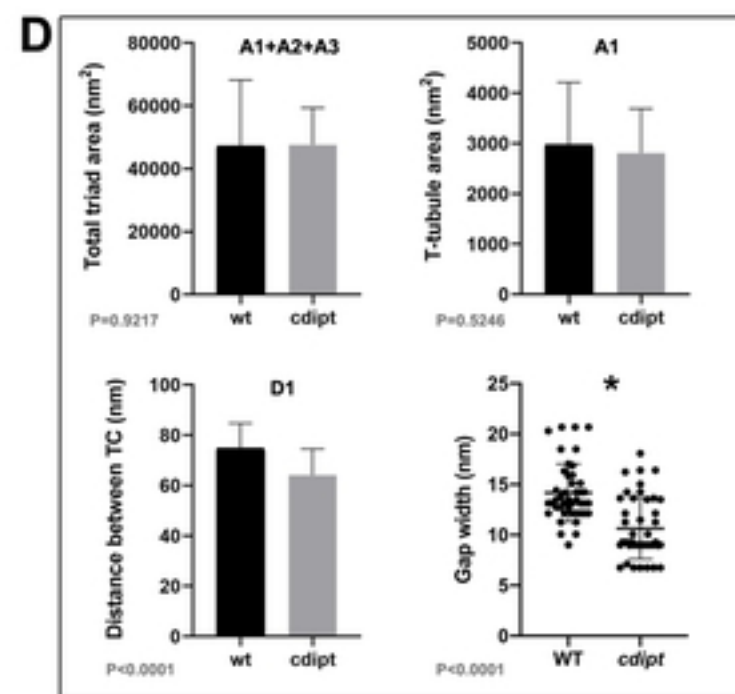

Figure 4

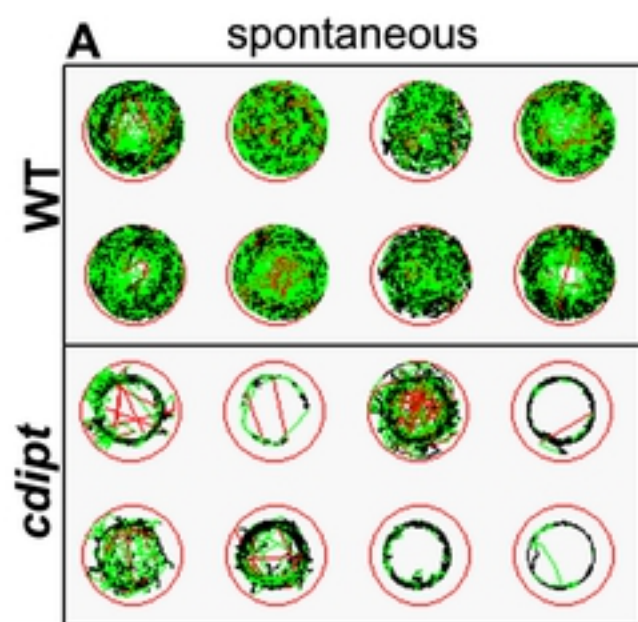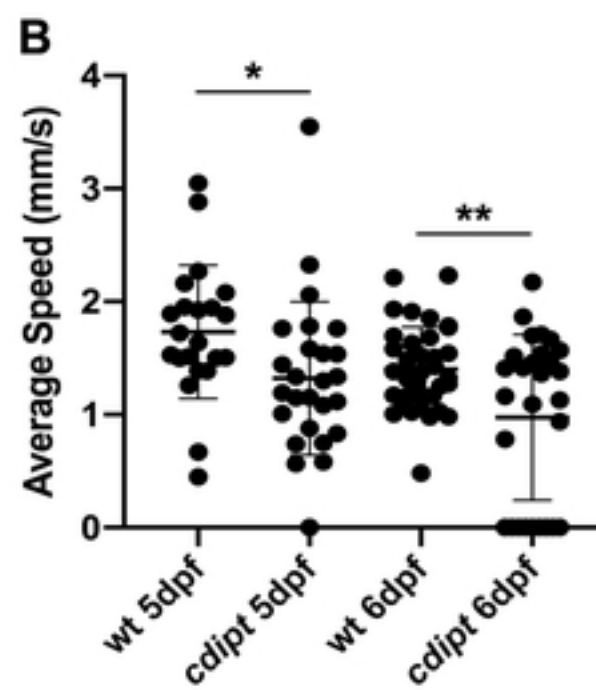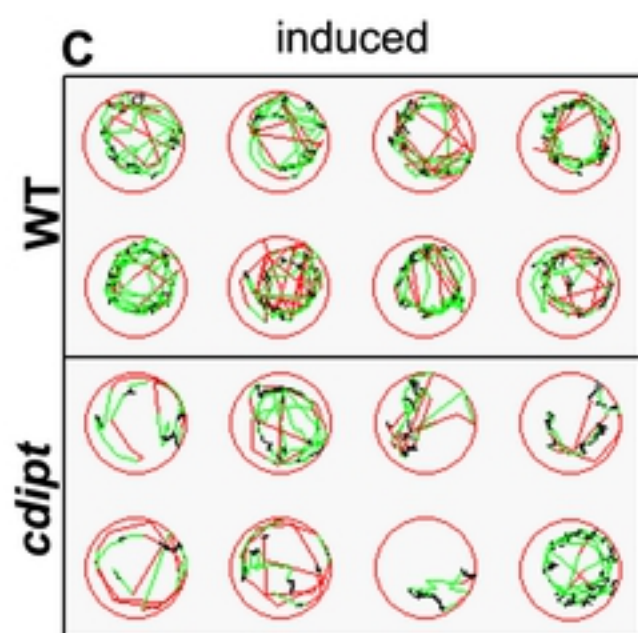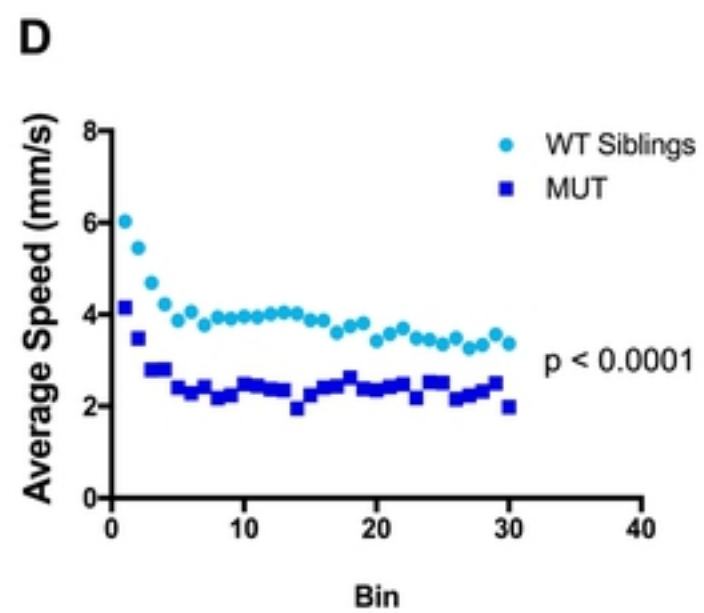

Figure 5

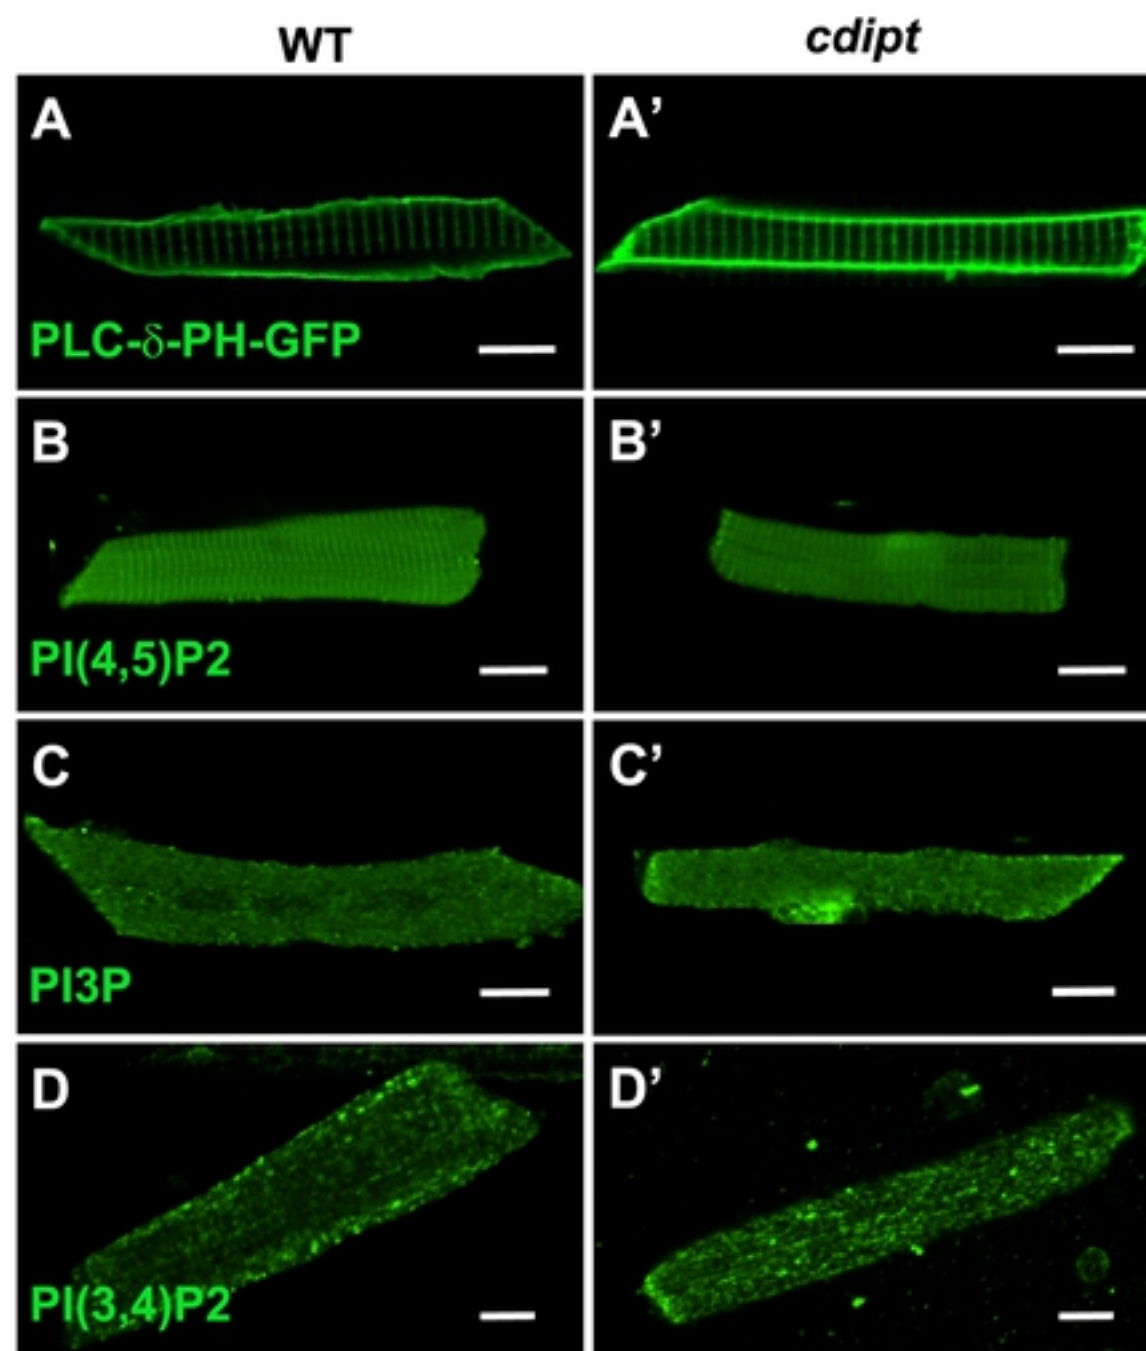

Figure 6

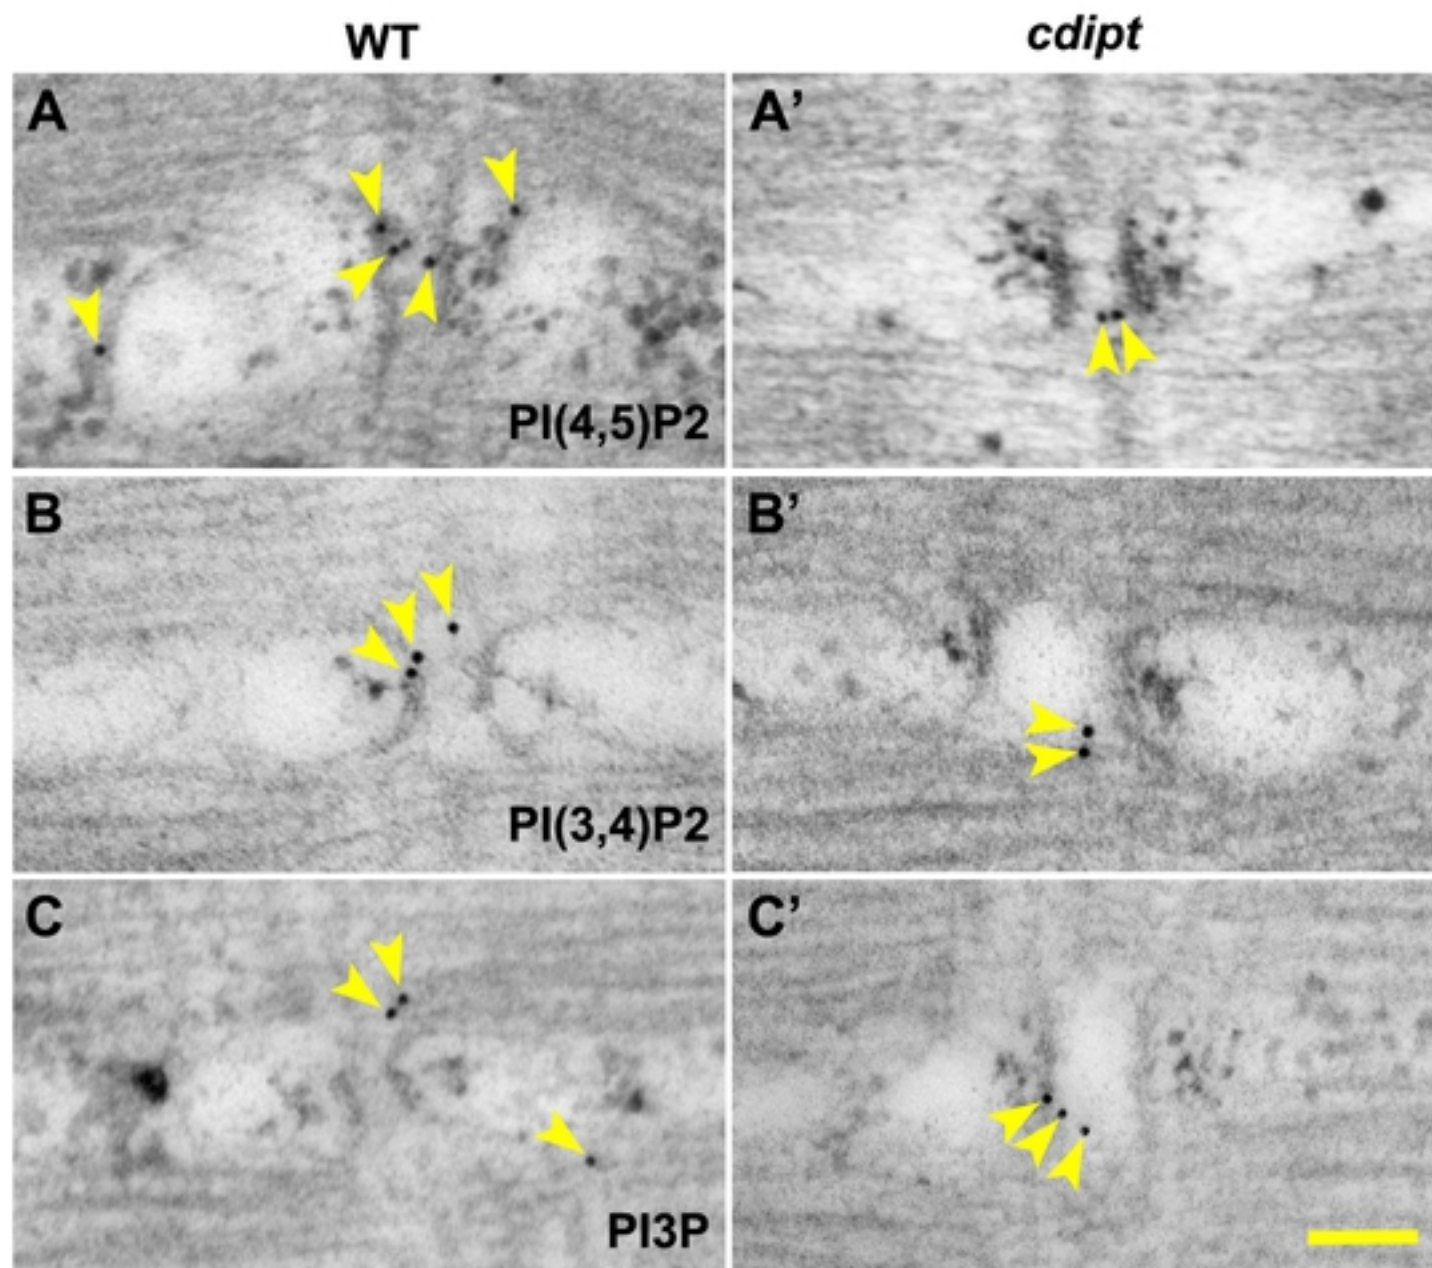

Source: https://www.biorxiv.org/content/10.1101/2020.03.24.005306v1.full.pdf
